# Supplementary material for: Different Outcomes According to Needling Point Location Used in Sham Acupuncture for Cancer-Related Pain: A Systematic Review and Network Meta-Analysis
Source: MDPI journal article supplement (doi:10.3390/cancers15245875), 2023-12-17
Supplement: s1 [file s1]

## **Supplementary Online Contents**

**Supplement 1. The search strategy used in each database**

**Supplement 2. Excluded studies after full-text review**

**Supplement 3. Details of acupuncture treatment method and funding sources of the included studies**

**Supplement 4. Contribution matrix**

**Supplement 5. Results of testing inconsistency at the local level through the node splitting method**

**Supplement 6. Risk of bias summary for all included studies**

**Supplement 7. SUCRA plot**

**Supplement 8. The certainty of the evidence**

## Supplement 1. The search strategy used in each database

### MEDLINE via PubMed

|    | Searches                                                                                                                                                                                | Results    |
|----|-----------------------------------------------------------------------------------------------------------------------------------------------------------------------------------------|------------|
| #1 | Neoplasms[MH] OR Carcinoma[MH] OR cancer*[TIAB] OR neoplasm*[TIAB] OR carcino*[TIAB] OR tumor*[TIAB] OR tumour*[TIAB] OR malignan*[TIAB]                                                | 5,059,815  |
| #2 | Pain[MH] OR Analgesia[MH] OR pain*[TIAB] OR analges*[TIAB] OR nocicept*[TIAB] OR neuropath*[TIAB]                                                                                       | 1,204,295  |
| #3 | Acupuncture[MH] OR “Acupuncture Therapy”[MH] OR “Acupuncture Points”[MH] OR acupunct*[TIAB] OR acupoint*[TIAB] OR “Dry Needling”[MH] OR “dry needling”[TIAB] OR "filiform needle"[TIAB] | 38,277     |
| #4 | “Randomized Controlled Trial”[PT] OR “Controlled Clinical Trial”[PT] OR randomized[TIAB] OR placebo[TIAB] OR “Clinical Trials as Topic”[Mesh:noexp] OR randomly[TIAB] OR trial[TI]      | 1,537,513  |
| #5 | animals[MH] NOT humans[MH]                                                                                                                                                              | 5,121,735  |
| #6 | (#1 AND #2 AND #3 AND #4) NOT #5                                                                                                                                                        | <b>512</b> |

### Embase via Elsevier.com

|    | Searches                                                                                                                                                                                                     | Results   |
|----|--------------------------------------------------------------------------------------------------------------------------------------------------------------------------------------------------------------|-----------|
| #1 | Neoplasm/exp OR Carcinoma/exp OR ‘malignant neoplasm’/exp OR cancer*:ab,ti OR neoplasm*:ab,ti OR carcino*:ab,ti OR tumor*:ab,ti OR tumour*:ab,ti OR malignan*:ab,ti                                          | 7,054,289 |
| #2 | Pain/exp OR Analgesia/exp OR pain*:ab,ti OR analges*:ab,ti OR nocicept*:ab,ti OR neuropath*:ab,ti                                                                                                            | 2,332,120 |
| #3 | acupuncture/exp OR acupuncture*:ab,ti OR ‘acupuncture point’/exp OR ‘body meridian’/exp OR ‘body meridian’:ab,ti OR acupoint*:ab,ti OR 'dry needling'/exp OR 'dry needling':ab,ti OR ‘filiform needle’:ab,ti | 62,335    |
| #4 | 'crossover procedure':de OR 'double-blind procedure':de OR 'randomized controlled                                                                                                                            | 3,135,287 |

|    |                                                                                                                                                                                                                   |              |
|----|-------------------------------------------------------------------------------------------------------------------------------------------------------------------------------------------------------------------|--------------|
|    | trial':de OR 'single-blind procedure':de OR (random* OR factorial* OR crossover* OR cross NEXT/1 over* OR placebo* OR doubl* NEAR/1 blind* OR singl* NEAR/1 blind* OR assign* OR allocat* OR volunteer*):de,ab,ti |              |
| #5 | #1 AND #2 AND #3 AND #4                                                                                                                                                                                           | <b>1,008</b> |

## CENTRAL

|     | Searches                                                                      | Results    |
|-----|-------------------------------------------------------------------------------|------------|
| #1  | MeSH descriptor: [Neoplasms] explode all trees                                | 110,900    |
| #2  | MeSH descriptor: [Carcinoma] explode all trees                                | 17,997     |
| #3  | (cancer* OR neoplasm* OR carcino* OR tumor* OR tumour* OR malignan*):ti,ab,kw | 259,820    |
| #4  | #1 OR #2 OR #3                                                                | 271,680    |
| #5  | MeSH descriptor: [Pain] explode all trees                                     | 73,178     |
| #6  | MeSH descriptor: [Analgesia] explode all trees                                | 11,724     |
| #7  | (pain* OR analges* OR nocicept* OR neuropath*):ti,ab,kw                       | 258,565    |
| #8  | #5 OR #6 OR #7                                                                | 269,263    |
| #9  | MeSH descriptor: [Acupuncture] explode all trees                              | 713        |
| #10 | MeSH descriptor: [Acupuncture Therapy] explode all trees                      | 6,380      |
| #11 | MeSH descriptor: [Acupuncture Points] explode all trees                       | 2,494      |
| #12 | MeSH descriptor: [Dry Needling] explode all trees                             | 158        |
| #13 | (acupunct* OR acupoint* OR "dry needling" OR "filiform needle"):ti,ab,kw      | 21,189     |
| #14 | #9 OR #10 OR #11 OR #12 OR #13                                                | 21,517     |
| #15 | (#4 AND #8 AND #14) in Trials                                                 | <b>866</b> |

## AMED via EBSCO

|    | Searches                                                                  | Results |
|----|---------------------------------------------------------------------------|---------|
| #1 | SU Neoplasms OR TX cancer* OR TX neoplasm* OR TX carcino* OR TX tumor* OR | 24,052  |

|    |                                                                                                                                                                                            |            |
|----|--------------------------------------------------------------------------------------------------------------------------------------------------------------------------------------------|------------|
|    | TX tumour* OR TX malignant*                                                                                                                                                                |            |
| #2 | SU Pain OR SU Analgesia OR TX pain* OR TX analges* OR TX nocicept* OR TX neuropath*                                                                                                        | 41,878     |
| #3 | SU Acupuncture OR SU “Acupuncture Therapy” OR SU "Acupuncture Analgesia" OR SU Acupoints OR SU Needles OR SU Needling OR SU "Dry needling" OR TX acupuncture* OR TX acupoint* OR TX needl* | 12,757     |
| #4 | #1 AND #2 AND #3                                                                                                                                                                           | <b>185</b> |

### CNKI

|    |                                               |           |
|----|-----------------------------------------------|-----------|
|    | Searches                                      | Results   |
| #1 | (SU='癌'+ '肿瘤'+ '瘤') AND (SU='痛') AND (SU='针') | <b>49</b> |

### Wanfang data

|    |                                                                   |             |
|----|-------------------------------------------------------------------|-------------|
|    | Searches                                                          | Results     |
| #1 | (题名或关键词:癌 OR 题名或关键词:肿瘤 OR 题名或关键词:瘤) AND (题名或关键词:痛) AND (题名或关键词:针) | <b>1153</b> |

### Chongqing VIP

|    |                                      |            |
|----|--------------------------------------|------------|
|    | Searches                             | Results    |
| #1 | M=(癌 OR 肿瘤 OR 瘤) AND M=(痛) AND M=(针) | <b>117</b> |

### OASIS

|    | Searches            | Results  |
|----|---------------------|----------|
| #1 | (암 종양 신생물) (통증) (침) | <b>0</b> |

#### KISS

|    | Searches                             | Results  |
|----|--------------------------------------|----------|
| #1 | 제목=(암 종양 신생물) AND 제목=(통증) AND 제목=(침) | <b>1</b> |

#### KMbase

|    | Searches                                   | Results  |
|----|--------------------------------------------|----------|
| #1 | (([TITLE=암] OR [TITLE=종양]) OR [TITLE=신생물]) | 9,525    |
| #2 | [TITLE=통증]                                 | 3,106    |
| #3 | [TITLE=침]                                  | 4,613    |
| #4 | #1 AND #2 AND #3                           | <b>2</b> |

## Supplement 2. Excluded studies after full-text review

### - Not randomized controlled trials: 13

1. Acupuncture can ease radiation therapy pain for cancer patients. *Chinese Health Care*. 2011(9):75.
2. Gao F. Clinical experience in the treatment of cancer pain with acupuncture. *Journal of Emergency in Traditional Chinese Medicine*. 2007;16(8):1004-5.
3. Yan J, Zhao S, Lu M. Needling method(cultivate the spirit and promoting blood circulation to arrest pain)for treatment of cancer pain *Journal of Changchun University of Traditional Chinese Medicine*. 2014(1).
4. Li L. Clinical Observation on Acupuncture in Treating Abdominal Pain of Gastric Cancer. *Journal of Clinical Acupuncture and Moxibustion*. 2000(12):9.
5. Li X, Jia C. Observation on the efficacy of Ziwu flow acupuncture in the treatment of cancer pain in 118 patients. *Chinese Journal of Rural Medicine and Pharmacy*. 1994(3):32-3.
6. Xu S, Li H, Meng X, Xu M, Yang L. Clinical observation on 42 cases of gastric cancer pain treated with acupuncture at Zusanli point. *Acupuncture Research*. 1994(Z1):131.
7. Song F. 30 cases of uterine fibroids treated with balance acupuncture. *Huaxia Medicine*. 2001;005(4):43-4.
8. Wang S, Jiang X, Wang J. Clinical observation on 106 cases of liver cancer pain treated with auricular acupuncture. *Journal of the Practical Chinese with Modern Medicine*. 2005;18(5):732-.
9. Chu S, Xu M. Clinical observation on the application of acupuncture at Zusanli point for analgesia due to cancerous abdominal pain. *Practical Clinical Journal of Integrated Traditional Chinese and Western*. 1994;007(1).
10. Shu Z. Acupuncture can ease radiation treatment pain for cancer patients. *Middle-aged and Elderly Health*. 2011(5):5.
11. Liu K, Dong G, Fei Y. Traditional acupuncture relieves cancer pain. *Family Medicine*. 2022(11):31.
12. Zhang W. 160 cases of cancer pain treated with acupuncture. *Journal of Emergency in Traditional Chinese Medicine*. 2008;17(4):543-4.
13. Alimi D. L'acupuncture auriculaire avec des aiguilles semi-permanentes soulage la douleur chez les patients cancéreux. *Acupunct Moxibustion*. 2005;4(2):147-52.

### - Not about cancer patients: 1

1. Han XR, Yue W, Chen HC, He W, Luo JH, Chen SX, et al. Treatment duration of wrist-ankle acupuncture for relieving post-thyroidectomy pain: A randomized controlled trial. *J Integr Med*. 2023;21(2):168-75.

### - Not about only manual acupuncture: 4

1. Tu J. Effect of Acupuncture on Analgesic Effect and Immune Function of Patients with Breast Cancer

- During Perioperative Period. Zhejiang Journal of Traditional Chinese Medicine. 2018;53(12):899.
2. Peng H, Peng HP, Xu L. Exploring the Feasibility of Applying Double Blind Design in Randomized Controlled Clinical Trial of Acupuncture Treating Carcinous Pain——A randomized controlled double blind trial in a small sample. Journal of Jiangxi University of Traditional Chinese Medicine. 2010;22(4):26-31.
  3. Wu J, Wang Y, Zhang Y, Zhao H. Clinical observation of acupuncture combined with auricular therapy and three-step analgesic ladder in treating cancer pain. Shanghai Journal of Traditional Chinese Medicine. 2017;51(10):48-51.
  4. Wu J, Zhang Y, Zhao H, Wang Z, Shen K, Deng H, et al. Clinical study on acupuncture combined with auricular point therapy in the treatment of cancer pain. Chinese Journal of Traditional Chinese Medicine. 2014;32(8):1904-6,后插8.

#### **- Not using sham acupuncture or wait-list as controls: 11**

1. Jiang B, Chen F, Deng S, Du H. 25 cases of cancer pain treated with acupuncture of Taichong and Hegu. Zhejiang Journal of Traditional Chinese Medicine. 2016;51(4):270.
2. Guo Z, Guo G, Yang J, Shao Y. Effect of acupuncture treatment on pain and quality of life in patients with advanced gastric cancer. International Journal of Traditional Chinese Medicine. 2015(4):371-3.
3. Dan Y, Liang Y, Tao Y. Clinical study on the analgesic effect of acupuncture on cancer pain. Chinese Acupuncture & Moxibustion. 1998(1):17-8.
4. Dang W, Yang J. Clinical study on acupuncture in treating gastric cancer pain. Chinese Acupuncture and Moxibustion. 1995(5):277-80,60.
5. Xiao J, Li L. Observation on 50 Cases of Acupuncture Relieving Cancer Pain. Acupuncture Research. 1994;19(3).
6. Li Y, Jiang S, Li F, Han C. Research on the analgesic effect of acupuncture on patients with advanced tumors. Academic Periodical of Changchun College of Traditional Chinese Medicine. 1998;14(3):29.
7. Luo Z, Yan R, Zhu S, Huang G. Analysis of the efficacy of acupuncture at the second metacarpal holographic point in the treatment of severe pain in advanced cancer. Guangdong Medical Journal. 1992(2):94-5.
8. Bian R. Observation on the analgesic effect of acupuncture on cancer pain. Journal of Practical Traditional Chinese Medicine. 1999(7):28.
9. Hu X, Ling CQ, Zhou QH. Clinical observation on wrist-ankle acupuncture for treatment of pain of middle-late liver cancer. Chinese acupuncture & moxibustion [zhong guo zhen jiu]. 2004;24(3):149-51.
10. Xiao JH, Li LJ. Observation of 50 cases of cancer pain relieved by acupuncture. Zhen Ci Yan Jiu [acupuncture research]. 1994;19(3):139-40.
11. Zeng K, Dong H, Chen H, Chen Z, Li B, Zhou Q. Wrist-Ankle Acupuncture for Pain After Transcatheter Arterial Chemoembolization in Patients with Liver Cancer: a Randomized Controlled Trial. American journal of Chinese medicine. 2014;42(2):289-302.

**- Not reporting pain severity: 3**

1. Wang T, Chen Y, Lou G. Impact of Intradermal Needle Therapy on Pain after Transcatheter Arterial Chemoembolization Operation of Hepatocellular Carcinoma Patients. *Journal of Traditional Chinese Medicine*. 2015;56(23):2033-5,48.
2. Deng G. Acupuncture As a Potential Opioid-Sparing Pain Management Intervention for Patients Undergoing Cancer Treatment. *Med Acupunct*. 2020;32(6):394-5.
3. Deng G, Giralt S, Chung DJ, Landau H, Siman J, Search B, et al. Acupuncture for reduction of symptom burden in multiple myeloma patients undergoing autologous hematopoietic stem cell transplantation: a randomized sham-controlled trial. *Supportive care in cancer*. 2017:1-9.

**- Duplicate: 1**

1. Hershman DL, Unger JM, Greenlee H, Capodice J, Lew DL, Darke A, et al. Comparison of Acupuncture vs Sham Acupuncture or Waiting List Control in the Treatment of Aromatase Inhibitor-Related Joint Pain: A Randomized Clinical Trial. *JAMA Netw Open*. 2022;5(11):e2241720.



### Supplement 3. Details of acupuncture treatment method and funding sources of the included studies

| Study ID   | Acupuncture protocol | Treatment points                                                                     | Depth of insertion | Needle stimulation | Needle retention time                                          | Needle type                                                         | Number of treatment sessions | Frequency    | Other interventions  | Qualification or experience of acupuncturists                                                                      | Study setting                                                                                                      | Funding sources                                                                                                                                                                         |
|------------|----------------------|--------------------------------------------------------------------------------------|--------------------|--------------------|----------------------------------------------------------------|---------------------------------------------------------------------|------------------------------|--------------|----------------------|--------------------------------------------------------------------------------------------------------------------|--------------------------------------------------------------------------------------------------------------------|-----------------------------------------------------------------------------------------------------------------------------------------------------------------------------------------|
| Alimi 2003 | Individualized       | Individualized ear acupuncture points where an electrical response had been detected | maximum 0.7 mm     | NR                 | Individualized (until the dates needles or seeds fell out/off) | sterile steel implants with 3.4 mm long, 1.2 mm diameter and height | 2                            | once a month | Analgesics as needed | a medical doctor/associate professor teaching auricular acupuncture at Paris XIII medical school (Bobigny, France) | Pain Management Unit at the Institut Gustave Roussy                                                                | grants from Institut Gustave Roussy (contrat de recherche clinique n°98-83), Schwab Medico, and the Lion's Club                                                                         |
| Bao 2013   | Standardized         | CV4, CV6, CV12, bilateral LI4, PC6, GB34, ST36, KI3, BL65                            | 0.5 inch           | NR                 | 20 min                                                         | 0.25 x 40 mm needle with Park sham needle                           | 8                            | once a week  | None                 | NR                                                                                                                 | Sidney Kimmel Comprehensive Cancer Center at Johns Hopkins and the University of Maryland Greenebaum Cancer Center | ASCO Foundation Young Investigator's Award, Susan Komen Postdoctoral Fellowship Award, Breast Cancer Research Foundation, Maryland Affiliate of Susan G. Komen for the Cure Craft grant |

|                      |                           |                                                                                                                                                                                                                                                                                                 |                                                                                                |                                                                   |                                              |                                                                                                         |    |                                                                                 |                                                                        |                                                                                                                        |                                              |                                                                                                                                                                                                                                                      |
|----------------------|---------------------------|-------------------------------------------------------------------------------------------------------------------------------------------------------------------------------------------------------------------------------------------------------------------------------------------------|------------------------------------------------------------------------------------------------|-------------------------------------------------------------------|----------------------------------------------|---------------------------------------------------------------------------------------------------------|----|---------------------------------------------------------------------------------|------------------------------------------------------------------------|------------------------------------------------------------------------------------------------------------------------|----------------------------------------------|------------------------------------------------------------------------------------------------------------------------------------------------------------------------------------------------------------------------------------------------------|
| Crew<br>2010         | Semi-<br>standar<br>dized | TE5, GB41, GB34, LI4,<br>ST41, KI3, (ear) shenmen,<br>kidney, liver, upper lung,<br>sympathetic<br>*Joint-specific points<br>-knee: SP9, SP10, ST34<br>-fingers: SI5, SI3, EX-<br>UE9, LI3<br>-lumbar: GV3, GV8, BL23<br>-shoulder: LI15, TE14,<br>SI10<br>-hip: GB30, GB39<br>-wrist: TE4, LI5 | proper<br>needlin<br>g depth<br>as<br>determi<br>ned by<br>standar<br>d point<br>locatio<br>ns | De qi,<br>restimulated<br>manually once<br>during each<br>session | 30 min                                       | body: 25 or 40<br>mm and 34-<br>gauge, ear: 15<br>mm and 38-<br>gauge                                   | 12 | twice a<br>week                                                                 | Nonnarcotic<br>and<br>nonsteroidal<br>pain<br>medications<br>as needed | one United States–<br>trained and New<br>York State-<br>licensed<br>acupuncturist                                      | NR                                           | a Lance Armstrong<br>Young Investigator<br>Award and an Advanced<br>Clinical Research Award<br>from the American<br>Society of Clinical<br>Oncology with funding<br>from AVON Products<br>Foundation and the<br>Breast Cancer Research<br>Foundation |
| Deng<br>2008         | Standar<br>dized          | bilateral BL12 to BL19,<br>extra point (Wei Guan Xia<br>Shu), ST36, (ear) shenmen                                                                                                                                                                                                               | NR                                                                                             | De qi                                                             | ST36, shenmen:<br>1 week, others:<br>4 weeks | ~1.5 mm long<br>with a diameter<br>of ~0.2 mm                                                           | 1  | once                                                                            | None                                                                   | NR                                                                                                                     | Memorial Sloan<br>Kettering<br>Cancer Center | National Cancer for<br>Complementary and<br>Alternative Medicine<br>grant AT002989                                                                                                                                                                   |
| Hersh<br>man<br>2018 | Semi-<br>standar<br>dized | TE5, LI4, GB41, GB34,<br>ST41, KI3, (ear) unilateral<br>shenmen, kidney, liver,<br>upper lung, and<br>sympathetic<br>*joint specific points<br>-shoulder: LI15, TE14,                                                                                                                           | inserted<br>at<br>traditio<br>nal<br>depths                                                    | De qi,<br>restimulated<br>manually once<br>during each<br>session | 30-45 min                                    | body: 1 inch, 1.5<br>inches and 34-<br>gauge or 3 inches<br>and 30-gauge,<br>ear: 15 mm and<br>38-gauge | 18 | twice a<br>week for 6<br>weeks,<br>followed<br>by once a<br>week for 6<br>weeks | None                                                                   | licensed<br>acupuncturists (at<br>least 3000 hours)<br>and medical<br>doctor<br>acupuncturists (at<br>least 100 hours) | 11 academic<br>centers<br>and clinical sites | National Institutes of<br>Health (NIH) National<br>Center for<br>Complementary and<br>Integrative Health and<br>the Office of Research on<br>Women's                                                                                                 |

|            |                   |                                                                                                                                            |    |                                                                                         |                                                               |                                                      |   |             |                      |                                                                                                                                                 |                                                          |                                                                                                                                                                                                                                                                     |
|------------|-------------------|--------------------------------------------------------------------------------------------------------------------------------------------|----|-----------------------------------------------------------------------------------------|---------------------------------------------------------------|------------------------------------------------------|---|-------------|----------------------|-------------------------------------------------------------------------------------------------------------------------------------------------|----------------------------------------------------------|---------------------------------------------------------------------------------------------------------------------------------------------------------------------------------------------------------------------------------------------------------------------|
|            |                   | SI10<br>-wrist: SI5, TE4, LI5<br>-fingers: SI3, EX-UE9, LI3<br>-lumbar: GV3, GV8, BL23<br>-hip: GB30, GB39<br>-knee: SP9, SP10, ST34       |    |                                                                                         |                                                               |                                                      |   |             |                      |                                                                                                                                                 |                                                          | HealthR01AT006376; NIH/NCI/DCP (Division of Cancer Prevention) grant UG1CA189974 and legacy grant U10CA37429.                                                                                                                                                       |
| Kim 2018   | Semi-standardized | CV12, bilateral ST25, LI4, LR3, PC6, and 0-3 ashi points                                                                                   | NR | All patients were instructed to press all the needle sites with their hands twice a day | 3 weeks (change every 48-72 hours)                            | 0.18 × 1.3 × 1.5 mm (intradermal acupuncture needle) | 1 | once        | Analgesics as needed | doctors of Korean medicine, at least 3 years of clinical experience, and had received more than 6 years of college education in Korean medicine | Dankook NGC Korean medicine clinic                       | Bio-Synergy Research Project (NRF-2017M3A9C4065964) of the Ministry of Science, ICT and Future Planning through the National Research Foundation; and the Comprehensive and Integrative Medicine Institute (CIMI), Daegu, Republic of Korea (Grant # CIMI-15-01-07) |
| Ruela 2018 | Semi-standardized | (ear) unilateral shenmen, kidney, sympathetic, muscle relaxation, and the energy balance points (defined through the Five Elements theory) | NR | The manual stimulation of the needles was not recommended.                              | the needles remained fixed on the points for up to seven days | 0.20 x 1.5 mm                                        | 8 | once a week | Analgesics as needed | a researcher, who has the necessary certification, to guarantee the homogeneity of the technique                                                | UNACON of the House of Charity Nossa Senhora do Perpétuo | Coordenação de Aperfeiçoamento de Pessoal de Nível Superior (CAPES)                                                                                                                                                                                                 |

|           |              |                                                                                |    |                                                                                                                                                                               |        |              |   |      |                      |                                                                                                                                   |                                                                   |                                                                                                                                                                                                |
|-----------|--------------|--------------------------------------------------------------------------------|----|-------------------------------------------------------------------------------------------------------------------------------------------------------------------------------|--------|--------------|---|------|----------------------|-----------------------------------------------------------------------------------------------------------------------------------|-------------------------------------------------------------------|------------------------------------------------------------------------------------------------------------------------------------------------------------------------------------------------|
|           |              |                                                                                |    |                                                                                                                                                                               |        |              |   |      |                      |                                                                                                                                   | Socorro – Santa Casa of Alfenas                                   |                                                                                                                                                                                                |
| Wang 2022 | Standardized | (ear) unilateral shenmen, sympathetic nerve, thalamus, point zero, and omega 2 | NR | Patients were instructed by the acupuncturists to press the acupuncture points three times a day, and when the NRS $\geq$ 4, each point was pressed for two minutes at a time | 6 days | 0.2 x 0.6 mm | 1 | once | Analgesics as needed | a registered acupuncturist, with a master's degree in acupuncture and more than three years of clinical experience in acupuncture | the Affiliated Hospital of Nanjing University of Chinese Medicine | a research grant from Affiliated Hospital of Nanjing University of Chinese Medicine (Y19074), the Priority Academic Program Development of Jiangsu Higher Education Institutions (2019YSHL089) |

NR, not recorded; NRS, numeric rating scale.

#### Supplement 4. Contribution matrix

|                                 |                    | Direct comparisons in the network |       |      |      |
|---------------------------------|--------------------|-----------------------------------|-------|------|------|
|                                 |                    | AvsB                              | AvsC  | AvsD | BvsD |
| Network meta-analysis estimates | Mixed estimates    |                                   |       |      |      |
|                                 | AvsB               | 31.5                              |       | 34.3 | 34.3 |
|                                 | AvsC               |                                   | 100.0 |      |      |
|                                 | AvsD               | 17.5                              |       | 65.0 | 17.5 |
|                                 | BvsD               | 21.0                              |       | 21.0 | 57.9 |
|                                 | -----              |                                   |       |      |      |
|                                 | Indirect estimates |                                   |       |      |      |
|                                 | BvsC               | 19.0                              | 39.7  | 20.7 | 20.7 |
|                                 | CvsD               | 9.6                               | 45.2  | 35.6 | 9.6  |
| Entire network                  |                    | 16.9                              | 30.8  | 29.6 | 22.6 |
| Included studies                |                    | 5                                 | 2     | 1    | 1    |

A, acupuncture therapy; B, sham acupuncture therapy at different points compared with the acupuncture group;  
C, sham acupuncture therapy at the same acupuncture points as the acupuncture group; D, waiting list.

**Supplement 5. Results of testing inconsistency at the local level through the node splitting method.**

| Side    | Direct comparison |           | Indirect comparison |          | Difference  |          | p value |
|---------|-------------------|-----------|---------------------|----------|-------------|----------|---------|
|         | Coefficient       | SE        | Coefficient         | SE       | Coefficient | SE       |         |
| AT WL   | 0.6947427         | 0.6853752 | 1.993709            | 1.413889 | -1.298967   | 1.564879 | 0.406   |
| AT SATV | 0.3930153         | 0.4953613 | 1.869405            | 446.529  | -1.47639    | 446.5292 | 0.997   |
| AT SATS | 0.7516725         | 0.3117922 | -0.7220365          | 452.9581 | 1.473709    | 452.9582 | 0.997   |
| SATS WL | 0.4291064         | 0.691101  | -0.8700041          | 1.405537 | 1.299111    | 1.564906 | 0.406   |

Note. All the evidence about these contrasts comes from the trials which directly compare them.

AT, acupuncture therapy; SATS, sham acupuncture therapy at different points compared with the acupuncture group; SATV, sham acupuncture therapy at the same acupuncture points as the acupuncture group; WL, waiting list.

**Supplement 6. Risk of bias summary for all included studies**

|               | Random sequence generation (selection bias) | Allocation concealment (selection bias) | Blinding of participants (performance bias) | Blinding of acupuncture therapist (performance bias) | Blinding of outcome assessment (detection bias) | Incomplete outcome data (attrition bias) | Selective reporting (reporting bias) | Other bias |
|---------------|---------------------------------------------|-----------------------------------------|---------------------------------------------|------------------------------------------------------|-------------------------------------------------|------------------------------------------|--------------------------------------|------------|
| Alimi 2003    | +                                           | +                                       | -                                           | +                                                    | -                                               | +                                        | +                                    | +          |
| Bao 2013      | +                                           | ?                                       | +                                           | +                                                    | +                                               | +                                        | +                                    | -          |
| Crew 2010     | +                                           | +                                       | +                                           | +                                                    | +                                               | +                                        | +                                    | -          |
| Deng 2008     | +                                           | +                                       | +                                           | +                                                    | +                                               | +                                        | +                                    | +          |
| Hershman 2018 | +                                           | +                                       | -                                           | +                                                    | -                                               | +                                        | +                                    | +          |
| Kim 2018      | +                                           | +                                       | +                                           | +                                                    | +                                               | +                                        | +                                    | +          |
| Ruela 2018    | +                                           | ?                                       | +                                           | +                                                    | +                                               | -                                        | +                                    | +          |
| Wang 2022     | +                                           | +                                       | -                                           | +                                                    | -                                               | +                                        | +                                    | +          |

Low, unclear, and high risk, respectively, are represented with the following symbols: “+”, “?”, and “-”.

### Supplement 7. SUCRA plot

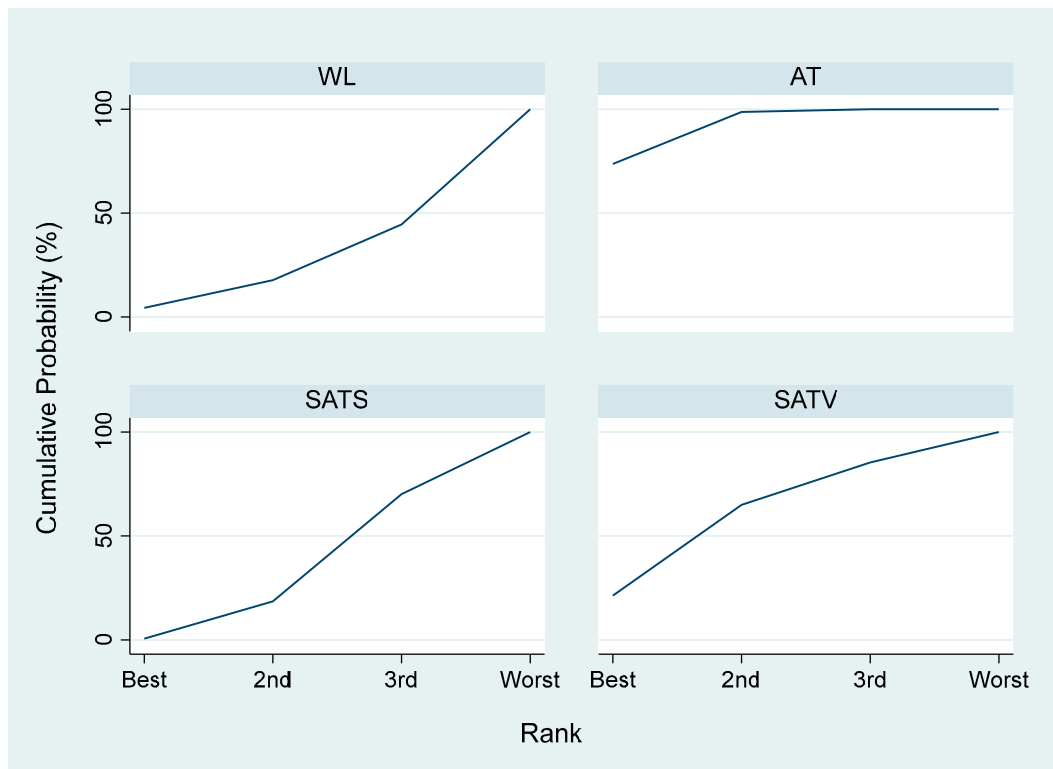

AT, acupuncture therapy; SATS, sham acupuncture therapy at different points compared with the acupuncture group; SATV, sham acupuncture therapy at the same acupuncture points as the acupuncture group; WL, waiting list.

\*SUCRA is a numeric presentation of the overall ranking and presents a single number associated with each treatment. SUCRA values range from 0 to 100%. The higher the SUCRA value, and the closer to 100%, the higher the likelihood that a therapy is in the top rank or one of the top ranks; the closer to 0 the SUCRA value, the more likely that a therapy is in the bottom rank, or one of the bottom ranks.



**Supplement 8. The certainty of the evidence**

| <b>Comparison</b> |      | <b>Direct evidence</b>        | <b>Indirect evidence</b>      | <b>Network meta-analysis</b>                 |
|-------------------|------|-------------------------------|-------------------------------|----------------------------------------------|
| AT                | SATV | Moderate<br>Risk of bias (-1) | -                             | Low<br>Risk of bias (-1)<br>Imprecision (-1) |
| AT                | SATS | Moderate<br>Risk of bias (-1) | Moderate<br>Risk of bias (-1) | Moderate<br>Risk of bias (-1)                |
| AT                | WL   | Moderate<br>Risk of bias (-1) | Moderate<br>Risk of bias (-1) | Low<br>Risk of bias (-1)<br>Imprecision (-1) |
| SATV              | SATS | -                             | Moderate<br>Risk of bias (-1) | Low<br>Risk of bias (-1)<br>Imprecision (-1) |
| SATV              | WL   | -                             | Moderate<br>Risk of bias (-1) | Low<br>Risk of bias (-1)<br>Imprecision (-1) |
| SATS              | WL   | Moderate<br>Risk of bias (-1) | Moderate<br>Risk of bias (-1) | Low<br>Risk of bias (-1)<br>Imprecision (-1) |

AT, acupuncture therapy; SATS, sham acupuncture therapy at different points compared with the acupuncture group; SATV, sham acupuncture therapy at the same acupuncture points as the acupuncture group; WL, waiting list.
